# Supplementary material
Source: publisher site journal article supplement (https://www.dovepress.com/article/523653)
Supplement: Supplementary file 1 [file 523653%20%252509Supplementary%20Material.docx]

Supplementary Material

Supplementary Table S1 Baseline characteristics by Dietary Inflammation Index (DII) quartiles (Q).

| Variables | Total (n = 8596) | Q1 (n = 2149) | Q2 (n = 2149) | Q3 (n = 2149) | Q4 (n = 2149) | *P* |
| --- | --- | --- | --- | --- | --- | --- |
|
| DII score | 0.84 (-0.73, 2.11) | -1.69 (-2.44, -1.13) | 0.05 (-0.32, 0.44) | 1.51 (1.17, 1.81) | 2.82 (2.45, 3.32) | <0.001 |
| Age | 46.00 (32.00, 61.00) | 46.00 (33.00,60.00) | 46.00 (32.00,60.00) | 46.00 (32.00,61.00) | 45.00 (32.00,61.00) | 0.153 |
| Age group |  |  |  |  |  | 0.263 |
| 20–34 years | 2513 (29.23) | 589 (27.41) | 638 (29.69) | 624 (29.04) | 662 (30.81) |  |
| 35-49 years | 2332 (27.13) | 614 (28.57) | 570 (26.52) | 573 (26.66) | 575 (26.76) |  |
| >50years | 3751 (43.64) | 946 (44.02) | 941 (43.79) | 952 (44.30) | 912 (42.44) |  |
| PIR group |  |  |  |  |  | <.001 |
| ≤1.3 | 2328 (27.08) | 459 (21.36) | 508 (23.64) | 603 (28.06) | 758 (35.27) |  |
| 1.3-3.5 | 3279 (38.15) | 736 (34.25) | 831 (38.67) | 866 (40.30) | 846 (39.37) |  |
| >3.5 | 2989 (34.77) | 954 (44.39) | 810 (37.69) | 680 (31.64) | 545 (25.36) |  |
| Sex |  |  |  |  |  |  |
| male | 4450 (51.77) | 1370 (63.75) | 1210 (56.31) | 1016 (47.28) | 854 (39.74) | <0.001 |
| Female | 4146 (49.23) | 714 (38.47) | 891 (42.05) | 1113 (54.67) | 1428 (61.72) |  |
| Race and ethnicity(%) |  |  |  |  |  | <.001 |
| Mexican American | 1180 (13.73) | 342 (15.91) | 324 (15.08) | 281 (13.08) | 233 (10.84) |  |
| Non-Hispanic White | 3628 (42.21) | 912 (42.44) | 893 (41.55) | 938 (43.65) | 885 (41.18) |  |
| Non-Hispanic Black | 1781 (20.72) | 333 (15.50) | 399 (18.57) | 481 (22.38) | 568 (26.43) |  |
| Other race | 2007 (23.35) | 562 (26.15) | 533 (24.80) | 449 (20.89) | 463 (21.54) |  |
| Educational level(%) |  |  |  |  |  | <.001 |
| Below high school | 1309 (15.23) | 285 (13.26) | 285 (13.26) | 353 (16.43) | 386 (17.96) |  |
| High school | 1939 (22.56) | 353 (16.43) | 457 (21.27) | 551 (25.64) | 578 (26.90) |  |
| Above high school | 5348 (62.21) | 1511 (70.31) | 1407 (65.47) | 1245 (57.93) | 1185 (55.14) |  |
| Marital status(%) |  |  |  |  |  | <.001 |
| Married | 4317 (50.22) | 1227 (57.10) | 1156 (53.79) | 1037 (48.26) | 897 (41.74) |  |
| Widowed/Divorced/Separated | 1702 (19.80) | 346 (16.10) | 367 (17.08) | 469 (21.82) | 520 (24.20) |  |
| Never married | 1730 (20.13) | 384 (17.87) | 419 (19.50) | 444 (20.66) | 483 (22.48) |  |
| Living with a partner | 847 (9.85) | 192 (8.93) | 207 (9.63) | 199 (9.26) | 249 (11.59) |  |
| Smoking status(%) |  |  |  |  |  | <.001 |
| never | 4549 (52.92) | 1181 (54.96) | 1198 (55.75) | 1115 (51.88) | 1055 (49.09) |  |
| former | 2121 (24.67) | 610 (28.39) | 563 (26.20) | 482 (22.43) | 466 (21.68) |  |
| current | 1926 (22.41) | 358 (16.66) | 388 (18.05) | 552 (25.69) | 628 (29.22) |  |
| Drinking status |  |  |  |  |  | 0.007 |
| Never drinker | 4332 (50.40) | 1129 (52.54) | 1129 (52.54) | 1044 (48.58) | 1030 (47.93) |  |
| Light/moderate drinker | 2909 (33.84) | 692 (32.20) | 694 (32.29) | 743 (34.57) | 780 (36.30) |  |
| Heavier drinker | 1355 (15.76) | 328 (15.26) | 326 (15.17) | 362 (16.85) | 339 (15.77) |  |
| Physical activity(%) |  |  |  |  |  | <.001 |
| insufficiently activity | 2820 (32.81) | 544 (25.31) | 695 (32.34) | 751 (34.95) | 830 (38.62) |  |
| Sufficient activity | 5776 (67.19) | 1605 (74.69) | 1454 (67.66) | 1398 (65.05) | 1319 (61.38) |  |
| Hypertension(%) | 3419 (39.77) | 805 (37.46) | 820 (38.16) | 886 (41.23) | 908 (42.25) | 0.002 |
| Diabetes(%) | 1433 (16.67) | 340 (15.82) | 352 (16.38) | 362 (16.85) | 379 (17.64) | 0.434 |
| Cancer status | 300 (3.49) | 77 (3.58) | 70 (3.26) | 76 (3.54) | 77 (3.58) | 0.925 |
| COPD status | 691 (8.04) | 135 (6.28) | 144 (6.70) | 207 (9.63) | 205 (9.54) | <0.001 |
| CVD(%) | 787 (9.16) | 196 (9.12) | 193 (8.98) | 184 (8.56) | 214 (9.96) | 0.448 |

Abbreviations:CVD: cardiovascular disease; DII: Dietary Inflammation Index.COPD, chronic obstructive pulmonary disease
